# Supplementary material for: A compendium of chromatin contact maps reflecting regulation by chromatin remodelers in budding yeast
Source: PubMed Central journal article supplement (PMC8569116; doi:10.1038/s41467-021-26629-6), 2021-11-04
Supplement: 41467_2021_26629_MOESM1_ESM.pdf [file 41467_2021_26629_MOESM1_ESM.pdf]

*Supplementary information for*

**A compendium of chromatin contact maps reflecting regulation by chromatin remodelers in budding yeast.**

Supplementary Figures 1-9

Supplementary Tables 1-4

Hyelim Jo<sup>1</sup>, Taemook Kim<sup>1</sup>, Yujin Chun<sup>1</sup>, Inkyung Jung<sup>1</sup>, Daeyoup Lee<sup>1,\*</sup>

<sup>1</sup>Department of Biological Sciences, Korea Advanced Institute of Science and Technology, 291 Daehak-ro, Yuseong-gu, Daejeon 34141, Republic of Korea

Phone: +82-42-350-2623

Fax: +82-42-350-2610

E-mail: [dylee@kaist.ac.kr](mailto:dylee@kaist.ac.kr)

## Supplementary Figure 1

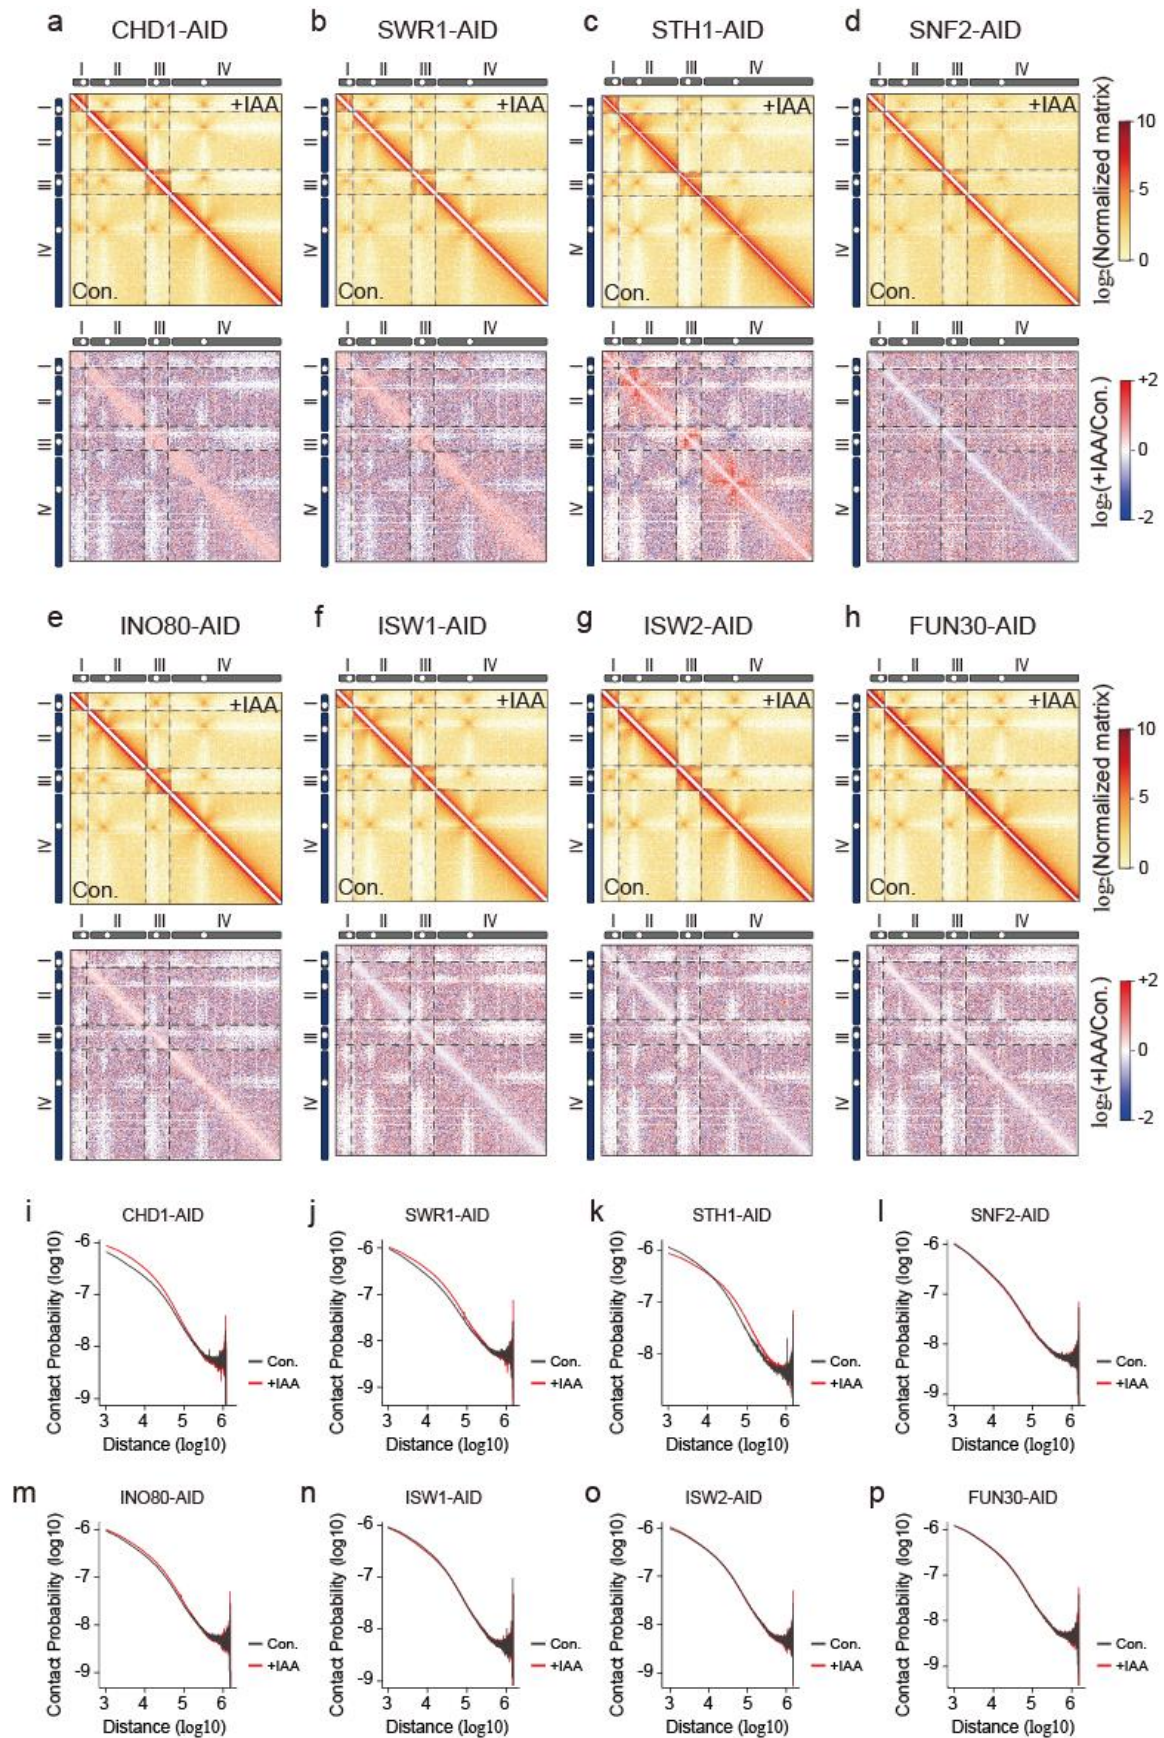

**Supplementary Figure 1. The studied chromatin remodelers can regulate the 3D architecture of chromatin (Async.).**

(a-h) Heatmaps (5-kb resolution) showing the chromosomal interactions from chromosome 1(I) to chromosome 4 (VI) for each chromatin remodeler *AID* strain. IAA (indole-3-acetic acid, auxin; 0.5 mM) was used to deplete each chromatin remodeler, and the same volume of ethanol was used as a control. The top panels show the ICE-normalized matrix of the control (bottom left, 'Con.') and knockdown (top right, '+IAA') conditions, and the bottom panel shows the  $\log_2$  ratio between control and knockdown samples. (i-p) Average contact probability (CP) according to genomic distance of *AID* strains.

## Supplementary Figure 2

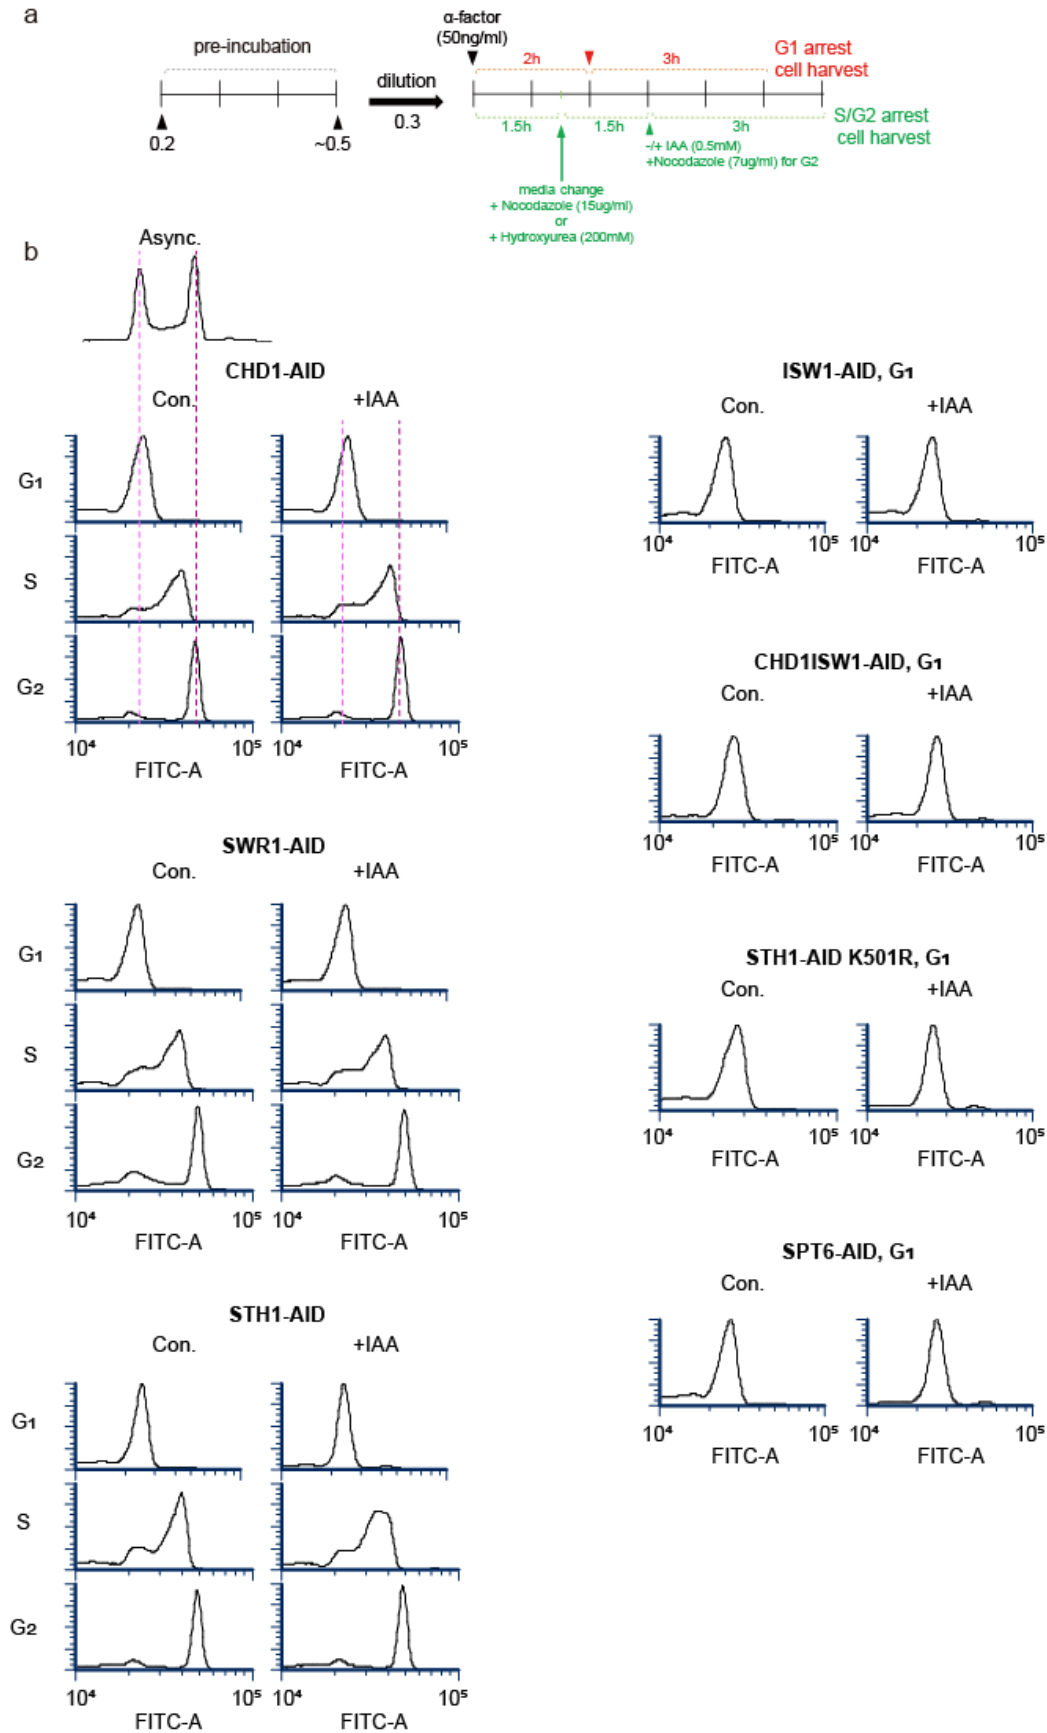

**Supplementary Figure 2. Flow cytometric analysis of cell cycle distributions for AID strains.**

- (a) Experimental scheme showing how we obtained the synchronized yeast cells used for *in situ* Hi-C. The red text indicates the process used to collect cells arrested at G<sub>1</sub>, while the green text indicates those used to collect cells arrested at S and G<sub>2</sub>. The same volume of ethanol was used for the -IAA samples.
- (b) Flow cytometric analysis for confirmation of cell cycle arrest at G<sub>1</sub>, S, and G<sub>2</sub>. The DNA contents (e.g., 1N, 2N) were quantified using SYTOX green (FITC) signals. The x-axis indicates the level of DNA content and the y-axis indicates the cell count. The singlet cells were used for cell cycle analysis and gating strategies are provided source data file.

### Supplementary Figure 3

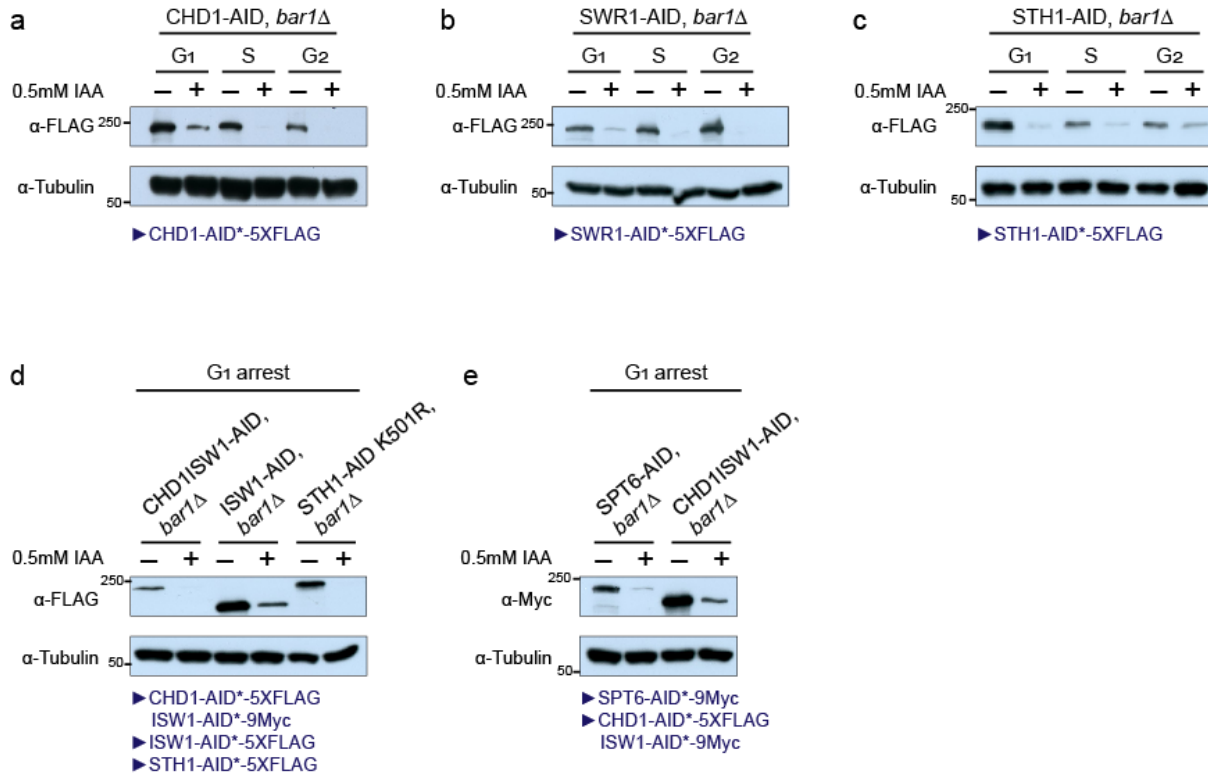

### Supplementary Figure 3. Chromatin remodeler proteins are degraded upon IAA treatment after cell cycle synchronization.

(a-c) Chd1p, Swr1p, and Sth1p were degraded after 3 hrs of IAA treatment under G<sub>1</sub>, S, and G<sub>2</sub> phase arrest conditions. α-FLAG antibody (Sigma; F7425, 1:5000) was used to detect Chd1p, Swr1p, or Sth1p. (d) Chd1p, Isw1p, and Sth1p were blotted using α-FLAG antibody after G<sub>1</sub> arrest. (e) Spt6p and Isw1p were detected by α-Myc antibody (Cell Signaling; 2276S, 1:3000) after G<sub>1</sub> arrest. α-Tubulin antibody (Abcam; ab6061, 1:5000) was used for a loading control (a-e). (a-e) are representative figures of two biologically independent experiments.

## Supplementary Figure 4

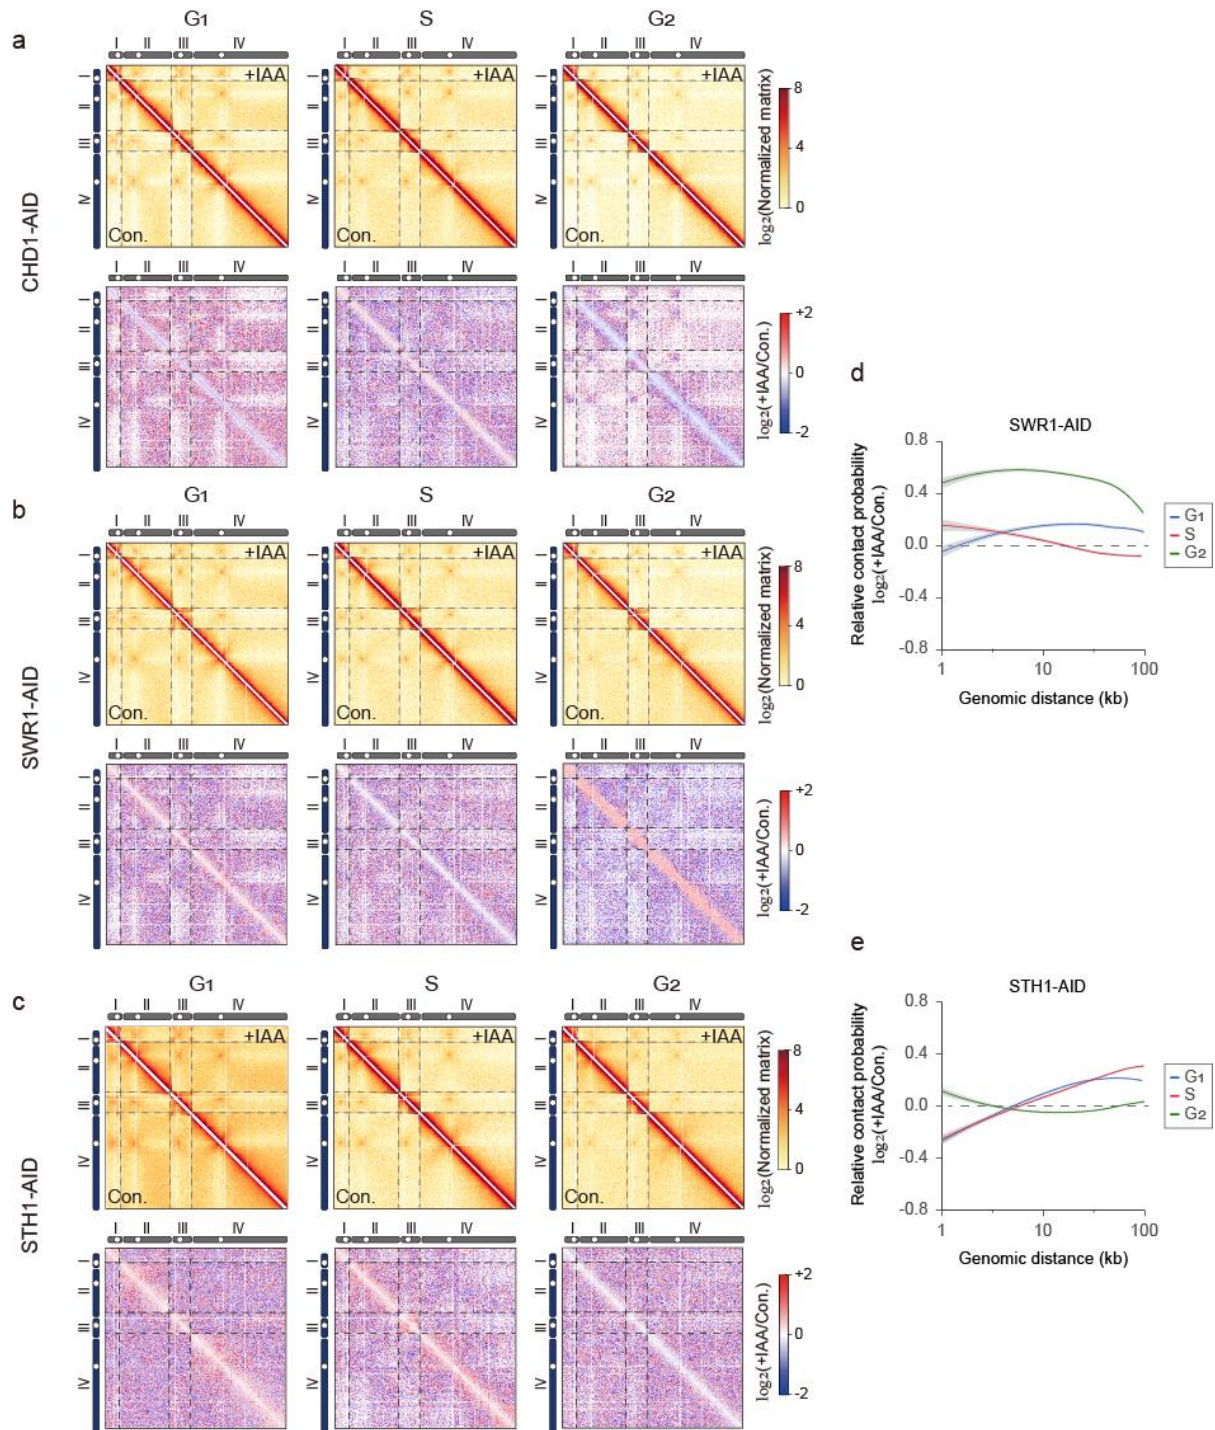

### Supplementary Figure 4. Chd1, Swr1p, and Sth1p dynamically regulate the 3D genome structure throughout the cell cycle.

(a-c) Heatmaps (5-kb resolution) showing the chromosomal interactions from chromosome 1(I) to chromosome 4(VI) for CHD1-AID, SWR1-AID, and STH1-AID strains at G<sub>1</sub>, S, and G<sub>2</sub> phase. The top

panels show the ICE-normalized matrices of the control (bottom left, 'Con.') and knockdown (top right, '+IAA') conditions, and the bottom panel shows the  $\log_2$  ratio between control and knockdown samples. (d-e)  $\log_2$  ratio of the average contact probability (CP) along genomic distance between control (Con.) and IAA-treated (+IAA) samples at G<sub>1</sub>, S, and G<sub>2</sub> phases for SWR1-AID and STH1-AID strains. The gray shadow indicates the confidence interval around smooth (se).



## Supplementary Figure 5

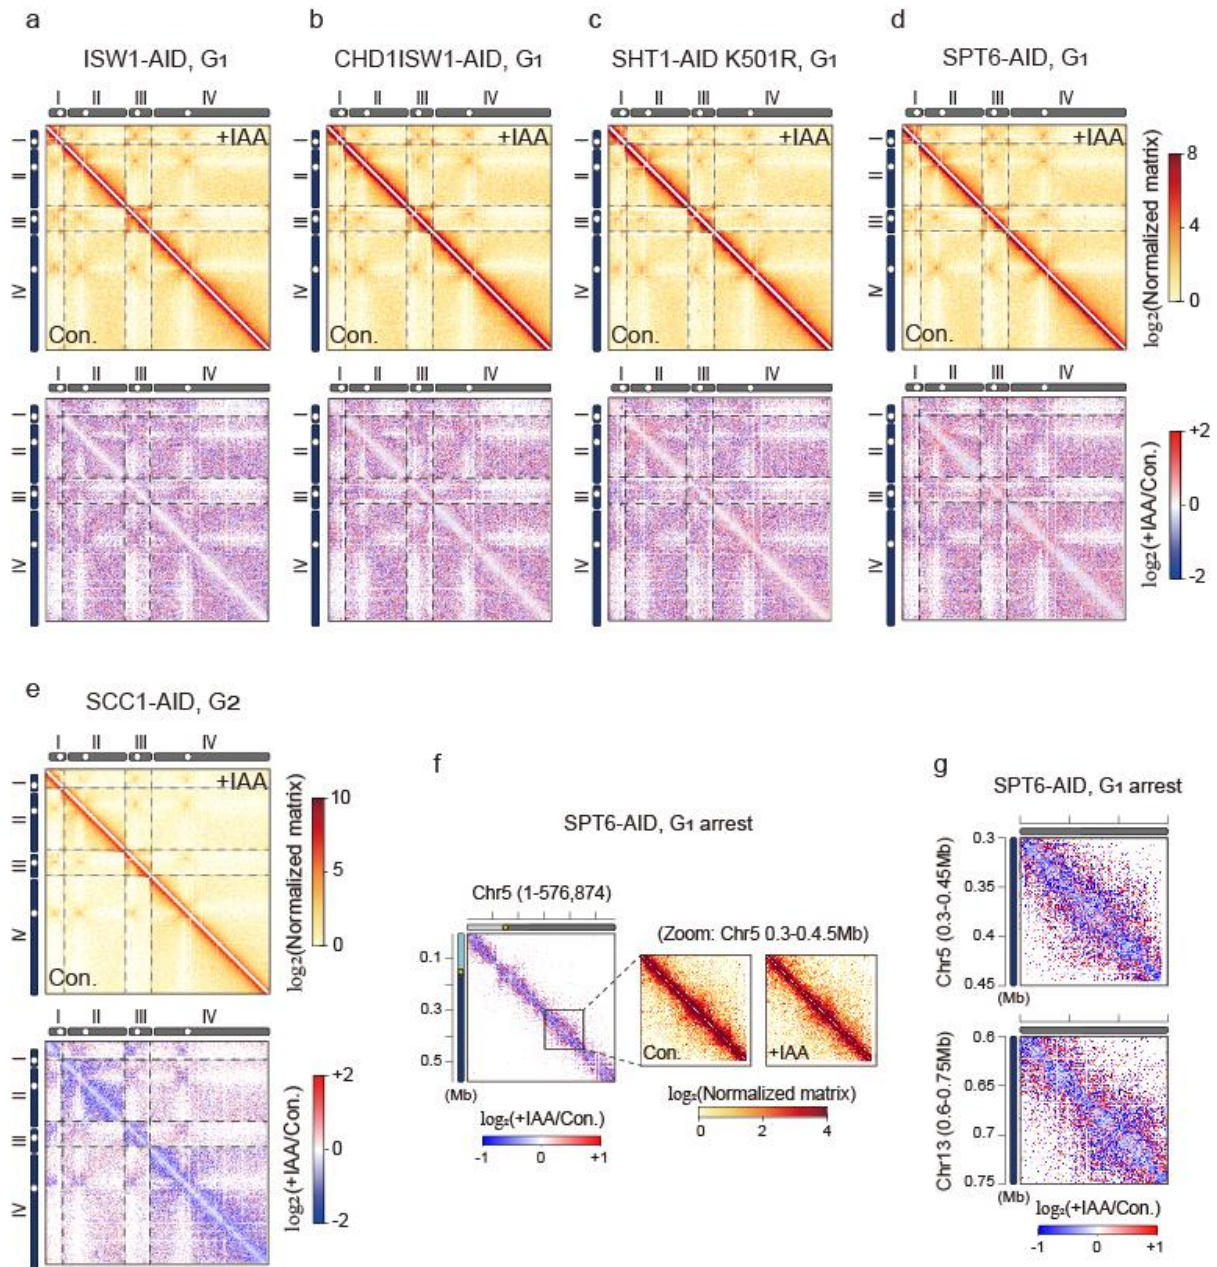

### Supplementary Figure 5. The 3D structure of the genome is controlled by several factors.

(a-e) Heatmaps (5-kb resolution) showing the chromosomal interactions from chromosome 1(I) to chromosome 4(VI) for ISW1-AID (a), CHD1ISW1-AID (b), STH1-AID K501R (c), and STP6-AID (d) strains at G<sub>1</sub> phase. The GSM2417297 dataset was used to perform the same analysis of SCC1-AID strain at G<sub>2</sub> phase (e). The top panels show the ICE-normalized matrices of the control (bottom left, 'Con.') and knockdown (top right, '+IAA') conditions, and the bottom panel shows the log<sub>2</sub> ratio between control and knockdown samples. (f) Heatmap (1-kb resolution) showing the chromosomal interactions

within chromosome 5 for SPT6-AID strain. The left panel shows the  $\log_2$  ratio between control and knockdown samples. The right two panels show zoom-in matrices of chromosome 5 (0.3-0.45 Mb) for the control ('Con.') and knockdown ('+IAA') conditions. (g)  $\log_2$  ratio interaction maps (1-kb resolution) between control and knockdown samples for chromosome 5 (0.3-0.45 Mb; upper panel) and chromosome 13 (0.6-0.75 Mb; lower panel).

## Supplementary Figure 6

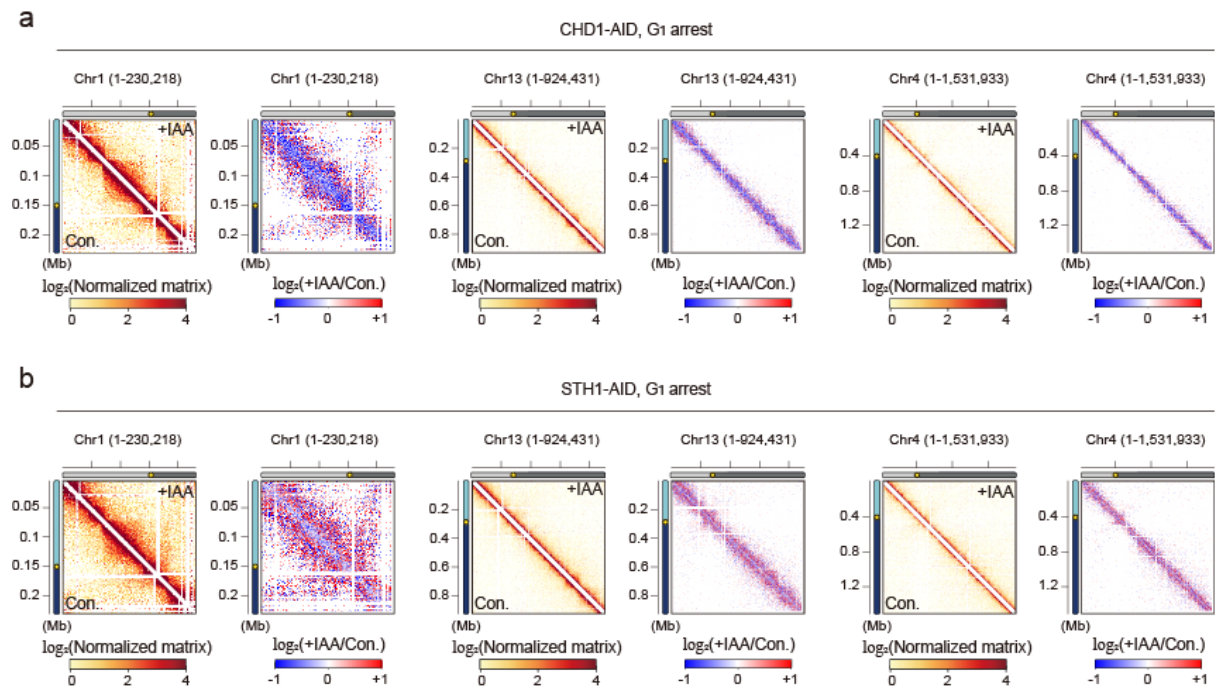

**Supplementary Figure 6. The chromatin remodelers show common functions in 3D genome organization.**

(a) Interaction maps (1-kb resolution) for chromosomes 1, 13, and 4 in CHD1-AID strain at G<sub>1</sub> phase. The left panel shows the ICE-normalized matrix and the right panel shows the log<sub>2</sub> ratio between control and knockdown samples. (b) Same as in (a) but for STH1-AID strain at G<sub>1</sub> phase.

## Supplementary Figure 7

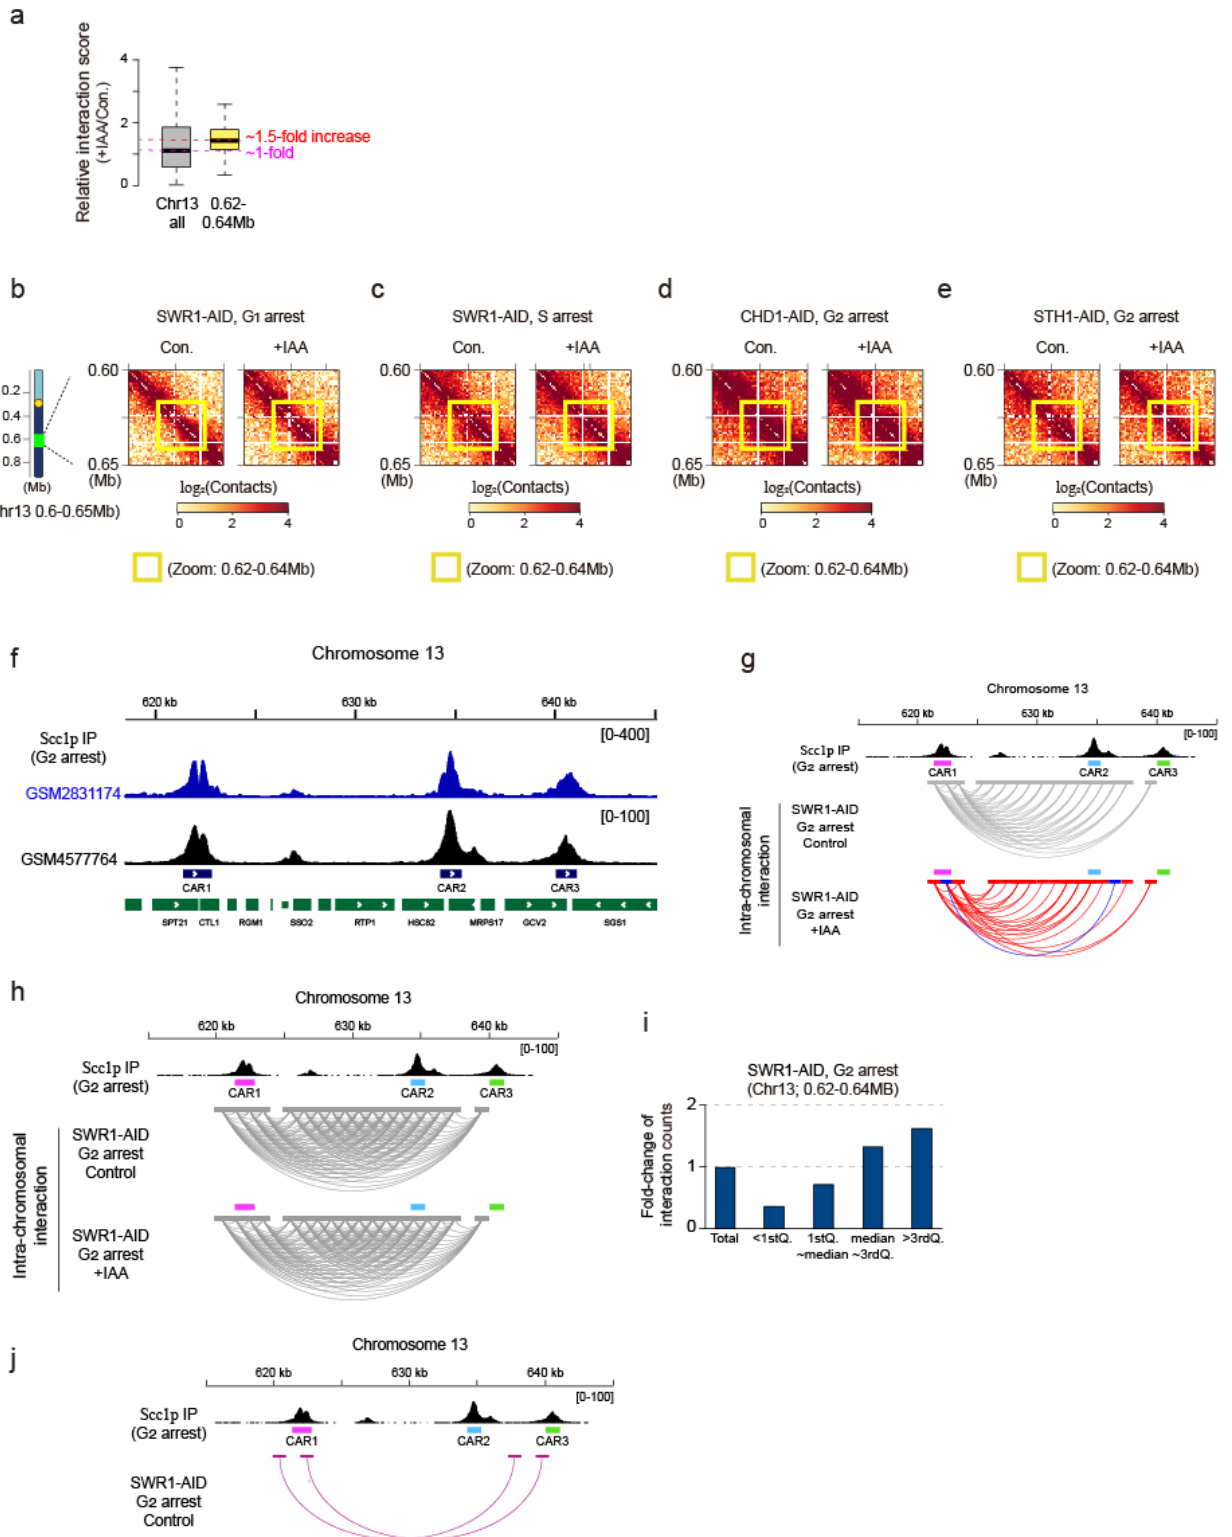

**Supplementary Figure 7. Swr1p is important for modulation of loop- like structures on chromosome 13 during G<sub>2</sub> phase.**

(a) Boxplot showing the fold-change of interaction score before and after IAA treatment in chromosome 13 (n= 157460) or only in 0.64-0.64Mb region (n= 170) on chromosome 13. The average fold-change indicated by using the value of median. Boxplot show median; box limits, upper and lower quartiles; whiskers. (b, c) Zoom-in log<sub>2</sub> ratio interaction maps of chromosome 13 (0.6-0.65 Mb region) in SWR1-AID strain at G<sub>1</sub> and S phases. Schematic representations including genomic distances and positions are displayed on the left side of (b) and the yellow dots indicate the point-centromere of the chromosome. (d, e) Zoom-in log<sub>2</sub> ratio interaction maps of chromosome 13 (0.6-0.65 Mb region) in CHD1-AID (d) and STH1-AID (e) strains at G<sub>2</sub> phase. (f) IGV data visualizing Scc1p IP signals and their peak on chromosome 13 under nocodazole-induced G<sub>2</sub>/M arrest. Datasets GSM283114 and GSM4577764 were analyzed. (g) (top) IGV data for Scc1p (GSM4577764) on chromosome 13 at G<sub>2</sub> phase. Pink, cyan, and yellow-green boxes indicate cohesin-associate regions (CARs) 1, 2 and 3. (bottom) Arc plot displaying intra-chromosomal interactions with CAR1 loci. The gray lines indicate whole intra-chromosomal contacts in control. The red lines indicated the increased contacts after IAA treatment while the blue lines indicated the decreased contacts upon IAA treatment. (h) IGV data indicated cohesion bounded-CAR and arc plot for whole intra-chromosomal interactions in control and +IAA sample. (i) The fold-change of intra-chromosomal interactions before and after IAA treatment in chromosome 13 or only in 0.64-0.64Mb region on chromosome 13. Total 168 contacts were divided into four groups (25%) by interaction score; (1) <1<sup>st</sup> Quantile, (2) >1<sup>st</sup> but <2<sup>nd</sup> Quantile (median), (3) >2<sup>nd</sup> but <3<sup>rd</sup> Quantile and (4) >3<sup>rd</sup> Quantile. (j) IGV data indicated cohesion bounded-CAR and arc plot showing the 14kb-distance intra-chromosomal interactions which were increased over 2-fold in +IAA.

**Supplementary Figure 8**

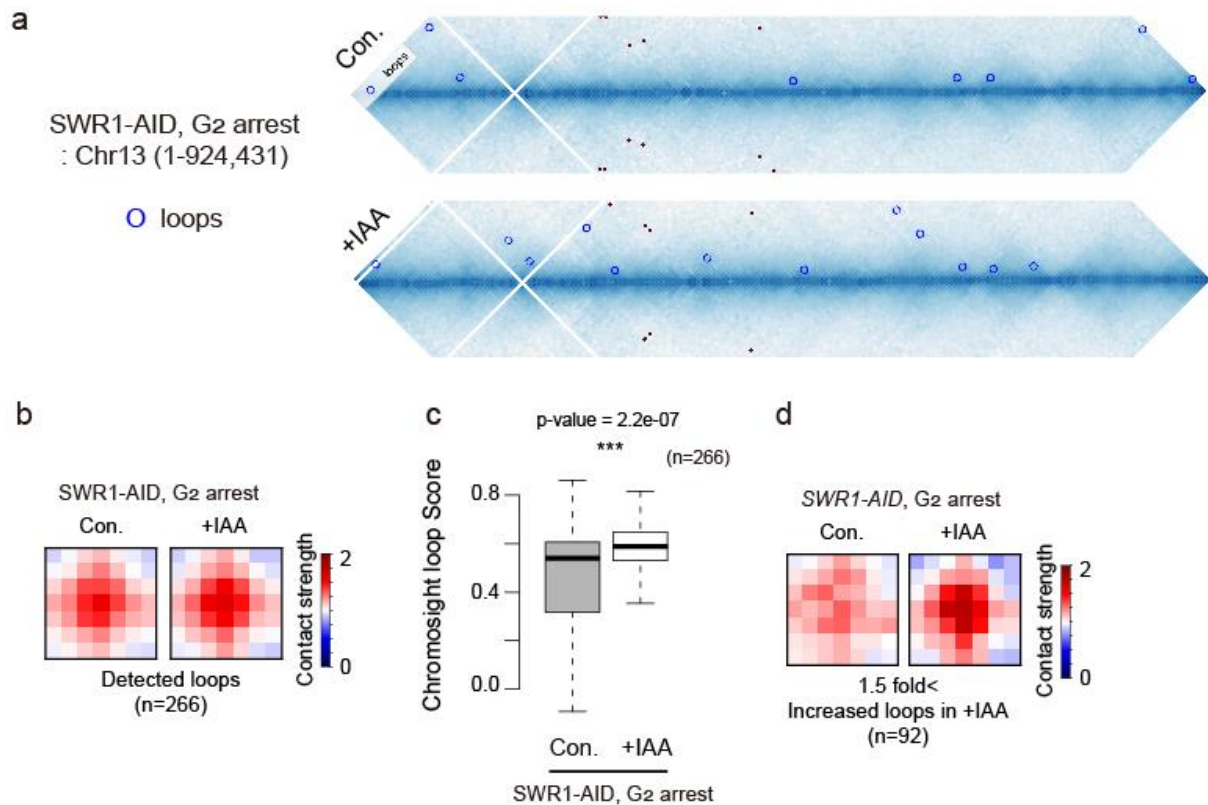

**Supplementary Figure 8. Swr1p is involved in modulation of loop- like structures on all 16 chromosomes during G<sub>2</sub> phase.**

(a) The interaction map of chromosome 13 for the control ('Con.') and knockdown ('+IAA') conditions in SWR1-AID strain at G<sub>2</sub> phase. The blue circles indicate loop positions detected by Chromosight. (b) the aggregate plot for detected loop position in control and +IAA samples from SWR1-AID strain at G<sub>2</sub> phase. (c) Boxplot for detected loops (n=266). The p-values were calculated by a one-sided Wilcoxon rank-sum test (\*\*\*) means p-value<0.001). Boxplot show median; box limits, upper and lower quartiles; whiskers. (d) Same as in (b) but showing loop positions that exhibited increases of >1.5-fold upon IAA treatment.

## Supplementary Figure 9

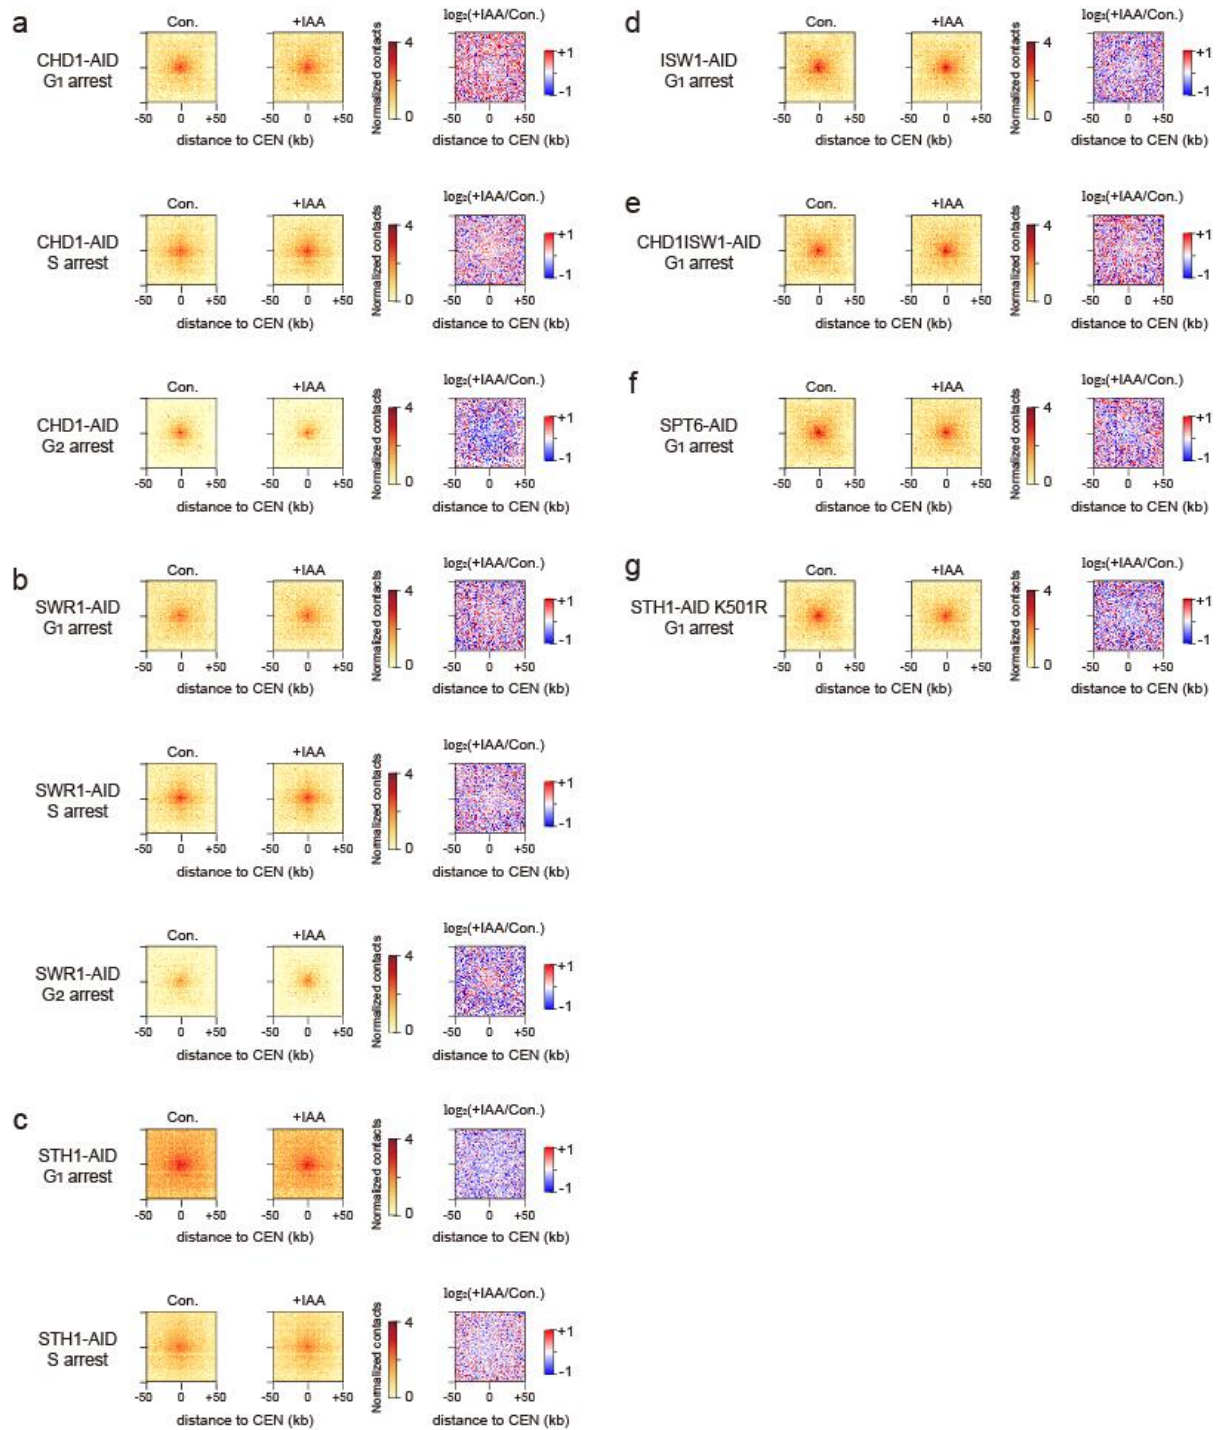

### Supplementary Figure 9. Chd1p and Swr1p affect centromere clustering during G<sub>2</sub> phase.

(a-g) Average matrices with 1-kb resolution showing inter CEN-CEN interactions (left panels) and their  $\log_2$  ratios (right panels).

**Supplementary Table 1. Yeast strain information**

|                                                                                                                                                                                  |                          |        |
|----------------------------------------------------------------------------------------------------------------------------------------------------------------------------------|--------------------------|--------|
| U2721, genetic background:DF5, MATa, his3-Δ200, leu2-3,2-112, lys2-801, trp1-1(am), URA3::TIR-9Myc                                                                               | Morawska et al., 2013    |        |
| CHD1-IAA*-FLAG, genetic background:DF5, paternal strain: U2721, his3-Δ200, leu2-3,2-112, lys2-801, trp1-1(am), URA3::TIR-9Myc, CHD1-44AID9Flag::hphNT                            | Klein-Brill et al., 2019 | NF188  |
| INO80-IAA*-FLAG, genetic background:DF5, paternal strain: U2721, his3-Δ200, leu2-3,2-112, lys2-801, trp1-1(am), URA3::TIR-9Myc, INO80-44AID9Flag::hphNT                          | Klein-Brill et al., 2019 | NF191  |
| SWR1-IAA*-FLAG, genetic background:DF5, paternal strain: U2721, his3-Δ200, leu2-3,2-112, lys2-801, trp1-1(am), URA3::TIR-9Myc, SWR1-44AID9Flag::hphNT                            | Klein-Brill et al., 2019 | NF193  |
| SNF2-IAA*-FLAG, genetic background:DF5, paternal strain: U2721, his3-Δ200, leu2-3,2-112, lys2-801, trp1-1(am), URA3::TIR-9Myc, SNF2-44AID9Flag::hphNT                            | Klein-Brill et al., 2019 | NF196  |
| STH1-IAA*-FLAG, genetic background:DF5, paternal strain: U2721, his3-Δ200, leu2-3,2-112, lys2-801, trp1-1(am), URA3::TIR-9Myc, STH1-44AID9Flag::hphNT                            | Klein-Brill et al., 2019 | NF198  |
| FUN30-IAA*-FLAG, genetic background:DF5, paternal strain: U2721, his3-Δ200, leu2-3,2-112, lys2-801, trp1-1(am), URA3::TIR-9Myc, FUN30-44AID9Flag::hphNT                          | Klein-Brill et al., 2019 | NF200  |
| ISW1-IAA*-FLAG, genetic background:DF5, paternal strain: U2721, his3-Δ200, leu2-3,2-112, lys2-801, trp1-1(am), URA3::TIR-9Myc, ISW1-44AID9Flag::hphNT                            | Klein-Brill et al., 2019 | NF202  |
| ISW2-IAA*-FLAG, genetic background:DF5, paternal strain: U2721, his3-Δ200, leu2-3,2-112, lys2-801, trp1-1(am), URA3::TIR-9Myc, ISW2-44AID9Flag::hphNT                            | Klein-Brill et al., 2019 | NF204  |
| SPT6-IAA*-MYC, genetic background:DF5, paternal strain: U2721, his3-Δ200, leu2-3,2-112, lys2-801, trp1-1(am), URA3::TIR-9Myc, SPT6-AID9Myc::kanmx                                | This paper               | SC1188 |
| SPT16-IAA*-MYC, genetic background:DF5, paternal strain: U2721, his3-Δ200, leu2-3,2-112, lys2-801, trp1-1(am), URA3::TIR-9Myc, SPT16-AID9Myc::kanmx                              | This paper               | SC1178 |
| SCC1-IAA*-FLAG, genetic background:DF5, paternal strain: U2721, his3-Δ200, leu2-3,2-112, lys2-801, trp1-1(am), URA3::TIR-9Myc, SCC1-AID6Flag::hphNT                              | This paper               | SC1260 |
| SCC2-IAA*-FLAG, genetic background:DF5, paternal strain: U2721, his3-Δ200, leu2-3,2-112, lys2-801, trp1-1(am), URA3::TIR-9Myc, SCC2-AID6Flag::hphNT                              | This paper               | SC1262 |
| <i>bar1Δ</i> CHD1-IAA*-FLAG<br>his3-Δ200, leu2-3,2-112, lys2-801, trp1-1(am), URA3::TIR-9Myc, CHD1-44AID9Flag::hphNT, <i>bar1Δ</i> ::natmx                                       | This paper               | SC1377 |
| <i>bar1Δ</i> SWR1-IAA*-FLAG<br>his3-Δ200, leu2-3,2-112, lys2-801, trp1-1(am), URA3::TIR-9Myc, SWR1-44AID9Flag::hphNT, <i>bar1Δ</i> ::natmx                                       | This paper               | SC1365 |
| <i>bar1Δ</i> STH1-IAA*-FLAG<br>his3-Δ200, leu2-3,2-112, lys2-801, trp1-1(am), URA3::TIR-9Myc, STH1-44AID9Flag::hphNT, <i>bar1Δ</i> ::natmx                                       | This paper               | SC1191 |
| <i>bar1Δ</i> ISW1-IAA*-FLAG<br>his3-Δ200, leu2-3,2-112, lys2-801, trp1-1(am), URA3::TIR-9Myc, ISW1-44AID9Flag::hphNT, <i>bar1Δ</i> ::natmx                                       | This paper               | SC1381 |
| <i>bar1Δ</i> CHD1-IAA*-FLAG, ISW1-IAA*-MYC<br>his3-Δ200, leu2-3,2-112, lys2-801, trp1-1(am), URA3::TIR-9Myc, CHD1-44AID9Flag::hphNT, ISW1-44AID9Myc::kanmx, <i>bar1Δ</i> ::natmx | This paper               | SC1367 |
| <i>bar1Δ</i> SPT6-IAA*-MYC, his3-Δ200, leu2-3,2-112, lys2-801, trp1-1(am), URA3::TIR-9Myc, SPT6-AID9Myc::kanmx, <i>bar1Δ</i> ::natmx                                             | This paper               | SC1372 |
| <i>bar1Δ</i> STH1-IAA*-FLAG STH1-K501R, his3-Δ200, leu2-3,2-112, lys2-801, trp1-1(am), URA3::TIR-9Myc, STH1-44AID9Flag::hphNT, STH1-K501R-V5::Leu, <i>bar1Δ</i> ::natmx          | This paper               | SC1374 |



**Supplementary Table 2. Primer sequences (5'-to-3')**

| <b>Primer name</b>    | <b>Sequence</b>                                                                  |
|-----------------------|----------------------------------------------------------------------------------|
| ISW1_degron_F         | GTTGGTAGCAGAGAAAAATCCGGAAAACGAAACCACTCATcgtacgctgcag<br>gtcgac                   |
| ISW1_degron_R         | AGGATATATTAATAAAAAATCGAAATATAAAAAAGAAGGTatcgatgaattcga<br>gctcg                  |
| ISW1_check_F          | GAG GGA TTG TAT TGG ATG ACG C                                                    |
| SPT6_degron_F         | aaaatctaacagtagtaagaatagaatgaacaactaccgt cgtacgctgcaggctcgac                     |
| SPT6_degron_R         | ATAATAAAATTAATAATAACAATGGACACTACATACGCAT<br>atcgatgaattcagctcg                   |
| SPT6_check_F          | GTT GAA CCA CGA TAA CCC TGG TT                                                   |
| bar1_deletion_F1      | CGCCTAAAATCATAACAAAATAAAAAGAGTGTCTAGAAGGGTCATATAC<br>GGATCCCCGGGTTAATTAA         |
| bar1_deletion_R1      | ATATTTGATATTTATATGCTATAAAGAAATTGTACTCCAGATTTCGAATTC<br>GAGCTCGTTTAAAC            |
| bar1_deletion_check_F | CTATTCTGAA ACACACCACA                                                            |
| Kan_R                 | CTGCAGCGAGGAGCCGTAAT                                                             |
| XmaI_Sth1_pro_F       | TTTCCCGGGTCGCGCTTGCTCTAAACTGTG                                                   |
| bamHI_Sth1_PK_R       | TTTGGATCCTTACGTAGAATCGAGACCGAGGAGAGGGTTAGGGATAGG<br>CTTACCCGAAGAGTGTTCTTGAACCATT |
| STH1_K501R_F          | ATG GGT TTA GGT CGA ACC ATC CAA TCT                                              |
| STH1_K501R_R          | AGA TTG GAT GGT TCG ACC TAA ACC CAT                                              |

### Supplementary Table 3. Valid interaction reads

(Async.)

|                         | CHD1 Con. | CHD1+IAA | SWR1 Con. | SWR1+IAA | STH1 Con. | STH1+IAA | SNF2 Con. | SNF2+IAA |
|-------------------------|-----------|----------|-----------|----------|-----------|----------|-----------|----------|
| valid interaction       | 20580057  | 32878071 | 27768746  | 15896822 | 31394612  | 36857666 | 19100291  | 21426071 |
| valid interaction rmdup | 17478203  | 28556212 | 23968520  | 14044357 | 28071361  | 32023686 | 17575645  | 19703338 |
| trans interaction       | 11201012  | 16017466 | 14949996  | 7781844  | 15011180  | 15554521 | 11537821  | 13084828 |
| cis interaction         | 6277191   | 12538746 | 9018524   | 6262513  | 13060181  | 16469165 | 6037824   | 6618510  |
| cis shortRange          | 2972073   | 6061752  | 4910145   | 3250745  | 6976477   | 6998120  | 3307636   | 3710013  |
| cis longRange           | 3305118   | 6476994  | 4108379   | 3011768  | 6083704   | 9471045  | 2730188   | 2908497  |

  

|                         | INO80 Con. | INO80+IAA | ISW1 Con. | ISW1+IAA | ISW2 Con. | ISW2+IAA | FUN30 Con. | FUN30+IAA |
|-------------------------|------------|-----------|-----------|----------|-----------|----------|------------|-----------|
| valid interaction       | 41303929   | 45335035  | 34406459  | 29466392 | 35324695  | 32272865 | 48996204   | 42659997  |
| valid interaction rmdup | 35834828   | 38430553  | 29630013  | 25839899 | 30430458  | 27903035 | 42437915   | 37238036  |
| trans interaction       | 21462670   | 21098198  | 16473497  | 14661685 | 17217409  | 15567171 | 22983492   | 19606454  |
| cis interaction         | 14372158   | 17332355  | 13156516  | 11178214 | 13213049  | 12335864 | 19454423   | 17631582  |
| cis shortRange          | 7450491    | 9014819   | 6649226   | 5488905  | 6614695   | 6323794  | 10631389   | 9681317   |
| cis longRange           | 6921667    | 8317536   | 6507290   | 5689309  | 6598354   | 6012070  | 8823034    | 7950265   |

  

|                         | SCC1 Con. | SCC1+IAA | SCC2 Con. | SCC2+IAA | SPT6 Con. | SPT6+IAA | SPT16 Con. | SPT16+IAA |
|-------------------------|-----------|----------|-----------|----------|-----------|----------|------------|-----------|
| valid interaction       | 17819654  | 13922566 | 20602966  | 15539428 | 23453625  | 24445474 | 21235825   | 16426358  |
| valid interaction rmdup | 16390186  | 12745964 | 18707107  | 14146630 | 21335718  | 22038877 | 19347216   | 14924838  |
| trans interaction       | 10882541  | 9473222  | 12488980  | 11065631 | 13617331  | 14338977 | 12468823   | 9911734   |
| cis interaction         | 5507645   | 3272742  | 6218127   | 3080999  | 7718387   | 7699900  | 6878393    | 5013104   |
| cis shortRange          | 2948208   | 1766471  | 3449384   | 1580653  | 4374018   | 3926276  | 4006947    | 2349843   |
| cis longRange           | 2559437   | 1506271  | 2768743   | 1500346  | 3344369   | 3773624  | 2871446    | 2663261   |

(Cell cycle arrest)

|                         | CHD1-G1 Con.    | CHD1-G1+IAA     | CHD1-S Con.     | CHD1-S+IAA      | CHD1-G2 Con.    | CHD1-G2+IAA     |
|-------------------------|-----------------|-----------------|-----------------|-----------------|-----------------|-----------------|
| valid interaction       | 15563530        | 13228313        | 11331119        | 19334256        | 17786875        | 15514701        |
| valid interaction rmdup | <b>13782902</b> | <b>11905761</b> | <b>10215941</b> | <b>17560643</b> | <b>16146847</b> | <b>14077774</b> |
| trans interaction       | 7157801         | 7171420         | 5902241         | 9519283         | 4578149         | 4837785         |
| cis interaction         | 6625101         | 4734341         | 4313700         | 8041360         | 11568698        | 9239989         |
| cis shortRange          | 4439538         | 2782879         | 2378788         | 4679238         | 7690271         | 6283530         |
| cis longRange           | 2185563         | 1951462         | 1934912         | 3362122         | 3878427         | 2956459         |

  

|                         | SWR1-G1 Con.    | SWR1-G1+IAA     | SWR1-S Con.     | SWR1-S+IAA      | SWR1-G2 Con.    | SWR1-G2+IAA     |
|-------------------------|-----------------|-----------------|-----------------|-----------------|-----------------|-----------------|
| valid interaction       | 12799895        | 14057476        | 17486422        | 19988187        | 17447728        | 22244354        |
| valid interaction rmdup | <b>11398883</b> | <b>12229590</b> | <b>15681710</b> | <b>17797584</b> | <b>15621308</b> | <b>19942966</b> |
| trans interaction       | 7013197         | 7301535         | 8715963         | 9780358         | 8159886         | 7336394         |
| cis interaction         | 4385686         | 4928055         | 6965747         | 8017226         | 7461422         | 12606572        |
| cis shortRange          | 2636118         | 2895470         | 3948494         | 4734488         | 4594080         | 8141227         |
| cis longRange           | 1749568         | 2032585         | 3017253         | 3282738         | 2867342         | 4465345         |

  

|                         | STH1-G1 Con.    | STH1-G1+IAA     | STH1-S Con.     | STH1-S+IAA      | STH1-G2 Con.    | STH1-G2+IAA     |
|-------------------------|-----------------|-----------------|-----------------|-----------------|-----------------|-----------------|
| valid interaction       | 19980703        | 19397564        | 12541689        | 15905893        | 12411424        | 13767848        |
| valid interaction rmdup | <b>18425598</b> | <b>17780998</b> | <b>11502170</b> | <b>14442674</b> | <b>11440620</b> | <b>12668323</b> |
| trans interaction       | 12018615        | 11433833        | 6360076         | 7815520         | 5933012         | 6618022         |
| cis interaction         | 6406983         | 6347165         | 5142094         | 6627154         | 5507608         | 6050301         |
| cis shortRange          | 3656256         | 3335050         | 2919773         | 3388595         | 2813787         | 3083823         |
| cis longRange           | 2750727         | 3012115         | 2222321         | 3238559         | 2693821         | 2966478         |

|                         | ISW1-G1_Con.    | ISW1-G1+IAA     | CHD1ISW1-G1_Con. | CHD1ISW1-G1+IAA | K501R-G1_Con.   | K501R-G1+IAA    |
|-------------------------|-----------------|-----------------|------------------|-----------------|-----------------|-----------------|
| valid_interaction       | 20923059        | 20387880        | 17604889         | 17696871        | 18726127        | 24507545        |
| valid_interaction_rmdup | <b>19086464</b> | <b>18284023</b> | <b>15862852</b>  | <b>15911409</b> | <b>16886216</b> | <b>21849682</b> |
| trans_interaction       | 10107521        | 9613703         | 8226389          | 8724548         | 8762569         | 11585761        |
| cis_interaction         | 8978943         | 8670320         | 7636463          | 7186861         | 8123647         | 10263921        |
| cis_shortRange          | 5801451         | 5609410         | 5068752          | 4536941         | 5340343         | 6333553         |
| cis_longRange           | 3177492         | 3060910         | 2567711          | 2649920         | 2783304         | 3930368         |

  

|                         | SPT6-G1_Con.    | SPT6-G1+IAA     | G2_Con.  | SCC1-G2+IAA |
|-------------------------|-----------------|-----------------|----------|-------------|
| valid_interaction       | 21143246        | 21391307        | 19709964 | 5167494     |
| valid_interaction_rmdup | <b>19084811</b> | <b>19330808</b> | 19005791 | 5066725     |
| trans_interaction       | 9611369         | 10633343        | 10146972 | 3046650     |
| cis_interaction         | 9473442         | 8697465         | 8858819  | 2020075     |
| cis_shortRange          | 6421618         | 5417487         | 4284986  | 1183155     |
| cis_longRange           | 3051824         | 3279978         | 4573833  | 836920      |

**Supplementary Table 4. Replication test (SCC and Pearson correlation value)**

Shown are the stratum-adjusted correlation coefficient (SCC) and Pearson product-moment correlation coefficient between replicates

- SCC value option: -v 18 -m 150000, whole chromosome average, 1-kb resolution matrix input

| <b>Sample_Name (Rep1-Rep2)</b>    | <b>SCC_value</b> | <b>Pearson</b> |
|-----------------------------------|------------------|----------------|
| CHD1_G1_Con.                      | 0.98758513       | 0.999          |
| CHD1_G1_IAA                       | 0.98538099       | 0.999          |
| CHD1_S_Con.                       | 0.97750346       | 0.987          |
| CHD1_S_IAA                        | 0.98322703       | 0.996          |
| CHD1_G2_Con.                      | 0.99067601       | 0.999          |
| CHD1_G2_IAA                       | 0.98737691       | 0.999          |
| SWR1_G1_Con.                      | 0.980904         | 0.998          |
| SWR1_G1_IAA                       | 0.98487592       | 0.997          |
| SWR1_S_Con.                       | 0.98643656       | 0.999          |
| SWR1_S_IAA                        | 0.98699355       | 0.999          |
| SWR1_G2_Con.                      | 0.9805686        | 0.999          |
| SWR1_G2_IAA                       | 0.99116411       | 0.999          |
| STH1_G1_Con.                      | 0.98771416       | 0.998          |
| STH1_G1_IAA                       | 0.9885877        | 0.999          |
| STH1_S_Con.                       | 0.9848053        | 0.998          |
| STH1_S_IAA                        | 0.98720728       | 0.997          |
| STH1_G2_Con.                      | 0.9835362        | 0.999          |
| STH1_G2_IAA                       | 0.98539059       | 0.998          |
| ISW1_G1_Con.                      | 0.99163226       | 0.998          |
| ISW1_G1_IAA                       | 0.99084796       | 0.996          |
| CHD1ISW1_G1_Con.                  | 0.98969335       | 0.992          |
| CHD1ISW1_G1_IAA                   | 0.98944276       | 0.999          |
| STH1K501R_G1_Con.                 | 0.98870504       | 0.999          |
| STH1K501R_G1_IAA                  | 0.99310418       | 0.998          |
| SPT6_G1_Con.                      | 0.99201977       | 0.996          |
| SPT6_G1_IAA                       | 0.99063258       | 0.994          |
| <b>Control_sample (Sample1/2)</b> | <b>SCC_value</b> |                |
| SWR1_G1/S_Con1                    | 0.82314842       |                |
| SWR1_G1/G2_Con1                   | 0.88650709       |                |
| SWR1_G2/S_Con1                    | 0.85857394       |                |
